# Supplementary material for: Relative Importance of Soluble and Microsomal Epoxide Hydrolases for the Hydrolysis of Epoxy-Fatty Acids in Human Tissues
Source: MDPI journal article supplement (doi:10.3390/ijms22094993), 2021-05-08

# **Relative importance of soluble and microsomal epoxide hydrolases for the hydrolysis of epoxy-fatty acids in human tissues (Supplemental Material)**

**Christophe Morisseau,<sup>1</sup> Sean D. Kodani,<sup>1</sup> S. George Kamita,<sup>1</sup> Jun Yang,<sup>1</sup> Kin Sing Stephen Lee,<sup>1</sup> and Bruce D. Hammock<sup>1\*</sup>**

<sup>1</sup> Department of Entomology and Nematology, and U.C. Davis Comprehensive Cancer Center, University of California Davis, Davis, CA 95616 USA

\* Correspondence: bdhammock@ucdavis.edu; Tel.: +1 530 752 7519

**Table S1:** Information regarding the origins of the human tissue extracts

| Vendor                                                                                                                                       | Tissue             | Donor sex | Donor age | [protein] mg/mL | Lot #   | buffer                                                                                                              |
|----------------------------------------------------------------------------------------------------------------------------------------------|--------------------|-----------|-----------|-----------------|---------|---------------------------------------------------------------------------------------------------------------------|
| Sekisui XenoTech, LLC<br>1101 W Cambridge Cir Dr, Kansas City, KS 66103<br><a href="https://www.xenotech.com/">https://www.xenotech.com/</a> | Kidney S9          | Mix of 13 |           | 4               | 1010324 | Tris-HCl, (50 mM pH 7.4), 150 mM KCl, 1 mM EDTA, 20% Glycerol, Heparin, PMSF, Leupeptin, DTT & Aprotinin            |
|                                                                                                                                              | Liver S9           | Mix of 50 |           | 20              | 1210091 |                                                                                                                     |
|                                                                                                                                              | Lung S9 non-smoker | Mix of 4  |           | 5               | 1410245 |                                                                                                                     |
|                                                                                                                                              | Lung S9 smoker     | Mix of 5  |           | 5               | 1110009 |                                                                                                                     |
|                                                                                                                                              | Small Intestine S9 | Mix of 10 |           | 5               | 1410073 |                                                                                                                     |
| BioChain Institute Inc.<br>39600 Eureka Drive Newark, CA 94560<br><a href="https://www.biochain.com/">https://www.biochain.com/</a>          | Adrenal            | M         | 25        | 3               | A304029 | HEPES (50mM pH 7.9), containing MgCl <sub>2</sub> , KCl, EDTA, sucrose, glycerol and cocktail of protease inhibitor |
|                                                                                                                                              | Esophagus          | M         | 77        | 5               | B906502 |                                                                                                                     |
|                                                                                                                                              | Heart              | F         | 76        | 3               | B109096 |                                                                                                                     |
|                                                                                                                                              | Hippocampus        | M         | 66        | 3               | A805194 |                                                                                                                     |
|                                                                                                                                              | Kidney             | F         | 83        | 3               | A508132 |                                                                                                                     |
|                                                                                                                                              | Liver              | M         | 26        | 3               | A512343 |                                                                                                                     |
|                                                                                                                                              | Lung               | M         | 50        | 3               | B406015 |                                                                                                                     |
|                                                                                                                                              | Ovary              | F         | 45        | 3               | A603194 |                                                                                                                     |
|                                                                                                                                              | Pancreas           | F         | 76        | 3               | B110220 |                                                                                                                     |
|                                                                                                                                              | Skin               | F         | 40        | 2.67            | A410143 |                                                                                                                     |
|                                                                                                                                              | Small intestine    | F         | 68        | 3               | A302181 |                                                                                                                     |
|                                                                                                                                              | spleen             | M         | 24        | 3               | A804197 |                                                                                                                     |
|                                                                                                                                              | Stomach            | F         | 66        | 5               | B906501 |                                                                                                                     |
|                                                                                                                                              | Testis             | M         | 56        | 3               | A301192 |                                                                                                                     |
|                                                                                                                                              | Tongue             | M         | 71        | 5               | B906503 |                                                                                                                     |

**Table S2:** Concentrations of sEH and mEH in human tissue extracts on the basis of western blot analysis and selective activity.

| Tissue                 | [sEH] (nM) |            | [mEH] (nM) |            |
|------------------------|------------|------------|------------|------------|
|                        | Western    | t-DPPO     | Western    | c-SO       |
| <b>Adrenal</b>         | < 19       | 14.1 ± 1.6 | 90 ± 42    | 287 ± 52   |
| <b>Esophagus</b>       | < 8        | 4.7 ± 0.4  | 13         | 12.5 ± 0.4 |
| <b>Heart</b>           | 6 ± 1      | 12.9 ± 0.4 | 5          | 10 ± 4     |
| <b>Hippocampus</b>     | 5 ± 1      | 4.8 ± 0.4  | 7          | 17 ± 2     |
| <b>Kidney</b>          | < 19       | 41.6 ± 1.2 | < 23       | 22 ± 11    |
| <b>Liver</b>           | 41 ± 6     | 88.2 ± 2.7 | 198 ± 114  | 850 ± 52   |
| <b>Lung</b>            | < 19       | 1.8 ± 0.4  | < 23       | 20 ± 2     |
| <b>Ovary</b>           | < 4        | 1.2 ± 0.2  | 6          | 5.8 ± 0.8  |
| <b>Pancreas</b>        | 39 ± 18    | 22.5 ± 3.2 | 108 ± 18   | 67 ± 4     |
| <b>Skin</b>            | < 16.7     | 3.4 ± 1.0  | < 21       | 6 ± 2      |
| <b>Small Intestine</b> | 13 ± 3     | 12.4 ± 0.4 | 10 ± 2     | 24 ± 2     |
| <b>Spleen</b>          | 5          | 3.2 ± 0.8  | < 5        | 5.8 ± 1.0  |
| <b>Stomach</b>         | < 5        | 1.6 ± 0.5  | 12         | 12 ± 2     |
| <b>Testis</b>          | 13 ± 6     | 5.8 ± 0.4  | 132 ± 18   | 96 ± 7     |
| <b>Tongue</b>          | 24 ± 11    | 9.6 ± 0.8  | 14         | 12 ± 1     |

Results are average ± standard deviation (n = 3).

**Table S3:** Hydrolytic activity of human tissue extracts for 14,15-EET and 13,14-EDP each at 5  $\mu$ M.

|                    | tissue          | Specific activity<br>(nmol.min <sup>-1</sup> .mg <sup>-1</sup> ) |                   |
|--------------------|-----------------|------------------------------------------------------------------|-------------------|
|                    |                 | 14,15-EET                                                        | 13,14-EDP         |
| S-9                | kidney          | 0.88 $\pm$ 0.08                                                  | 1.22 $\pm$ 0.09   |
|                    | liver           | 2.14 $\pm$ 0.36                                                  | 2.7 $\pm$ 0.2     |
|                    | lung non-smoker | 0.098 $\pm$ 0.006                                                | 0.068 $\pm$ 0.002 |
|                    | lung smoker     | 0.083 $\pm$ 0.006                                                | 0.089 $\pm$ 0.007 |
|                    | intestine       | 1.3 $\pm$ 0.3                                                    | 1.96 $\pm$ 0.03   |
| Whole cell extract | Adrenal         | 0.23 $\pm$ 0.03                                                  | 0.10 $\pm$ 0.01   |
|                    | Esophagus       | 0.06 $\pm$ 0.02                                                  | 0.009 $\pm$ 0.001 |
|                    | Heart           | 0.18 $\pm$ 0.05                                                  | 0.073 $\pm$ 0.003 |
|                    | Hippocampus     | 0.07 $\pm$ 0.02                                                  | 0.012 $\pm$ 0.007 |
|                    | Kidney          | 0.8 $\pm$ 0.1                                                    | 0.46 $\pm$ 0.02   |
|                    | Liver           | 1.5 $\pm$ 0.2                                                    | 1.8 $\pm$ 0.1     |
|                    | Lung            | 0.06 $\pm$ 0.01                                                  | 0.016 $\pm$ 0.003 |
|                    | Ovary           | 0.020 $\pm$ 0.003                                                | 0.010 $\pm$ 0.001 |
|                    | Pancreas        | 0.58 $\pm$ 0.04                                                  | 0.12 $\pm$ 0.01   |
|                    | Skin            | 0.06 $\pm$ 0.02                                                  | 0.003 $\pm$ 0.001 |
|                    | Small Intestine | 0.26 $\pm$ 0.03                                                  | 0.11 $\pm$ 0.01   |
|                    | Spleen          | 0.04 $\pm$ 0.01                                                  | 0.005 $\pm$ 0.002 |
|                    | Stomach         | 0.016 $\pm$ 0.003                                                | 0.010 $\pm$ 0.001 |
|                    | Testis          | 0.10 $\pm$ 0.03                                                  | 0.028 $\pm$ 0.003 |
|                    | Tongue          | 0.10 $\pm$ 0.03                                                  | 0.019 $\pm$ 0.001 |

Results are average  $\pm$  standard deviation (n = 3).

**Table S4:** Gene accession numbers.

| Protein name        | Gene name      | Gen-Bank<br>Accession number |
|---------------------|----------------|------------------------------|
| Epoxide hydrolase 3 | EPHX3 or ABHD9 | BC132960                     |
| Epoxide hydrolase 4 | EPHX4 or ABHD7 | BC041475                     |

**Figure S1:** Western blot analysis of human tissue extracts

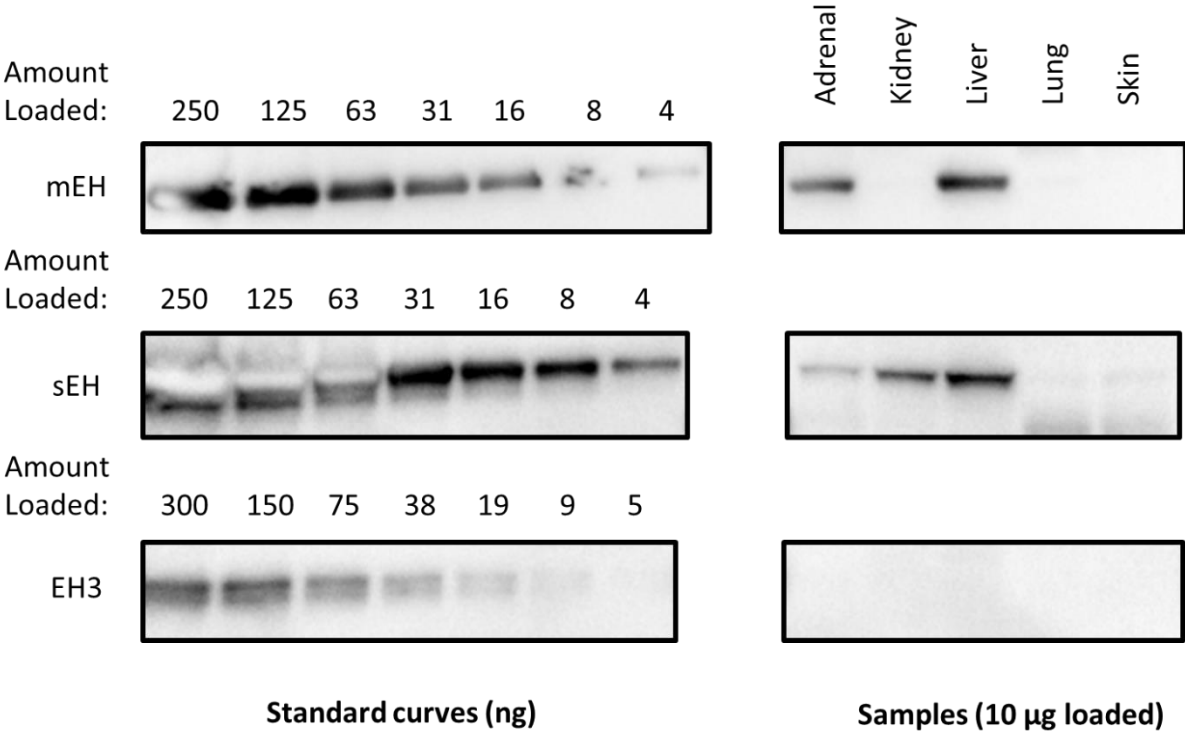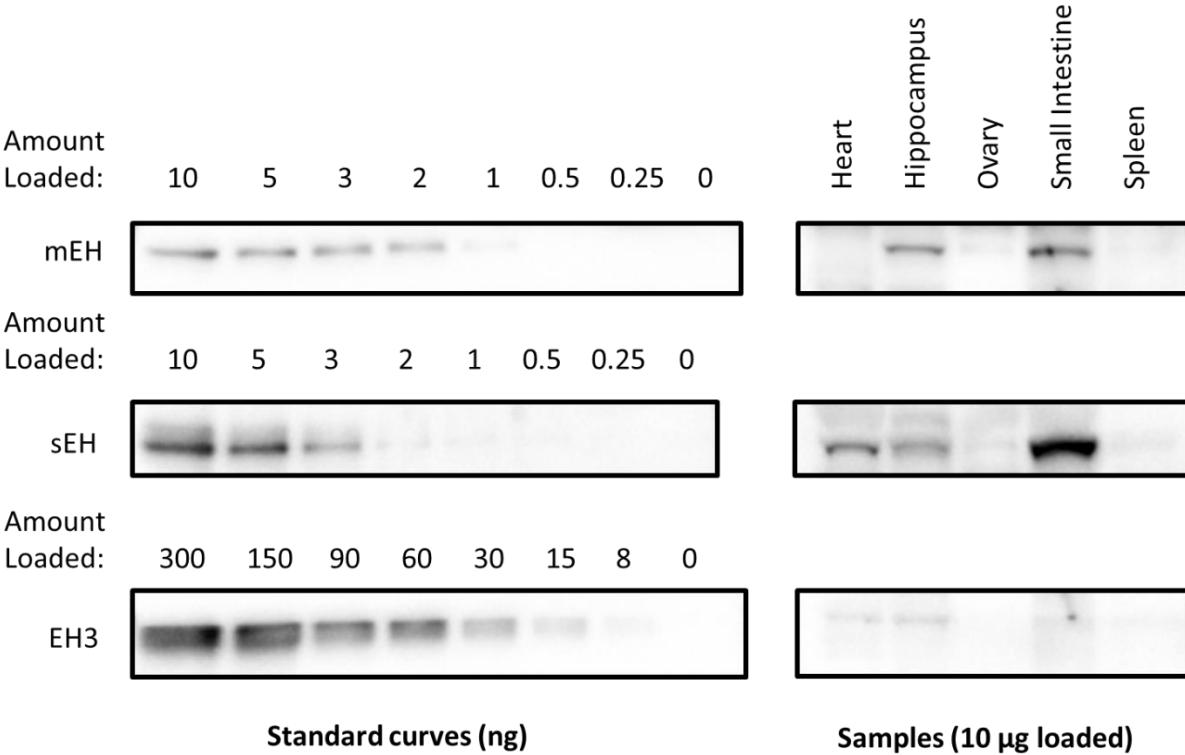

Figure S2: Hydrolysis selectivity of the human tissue extracts for EpFAs

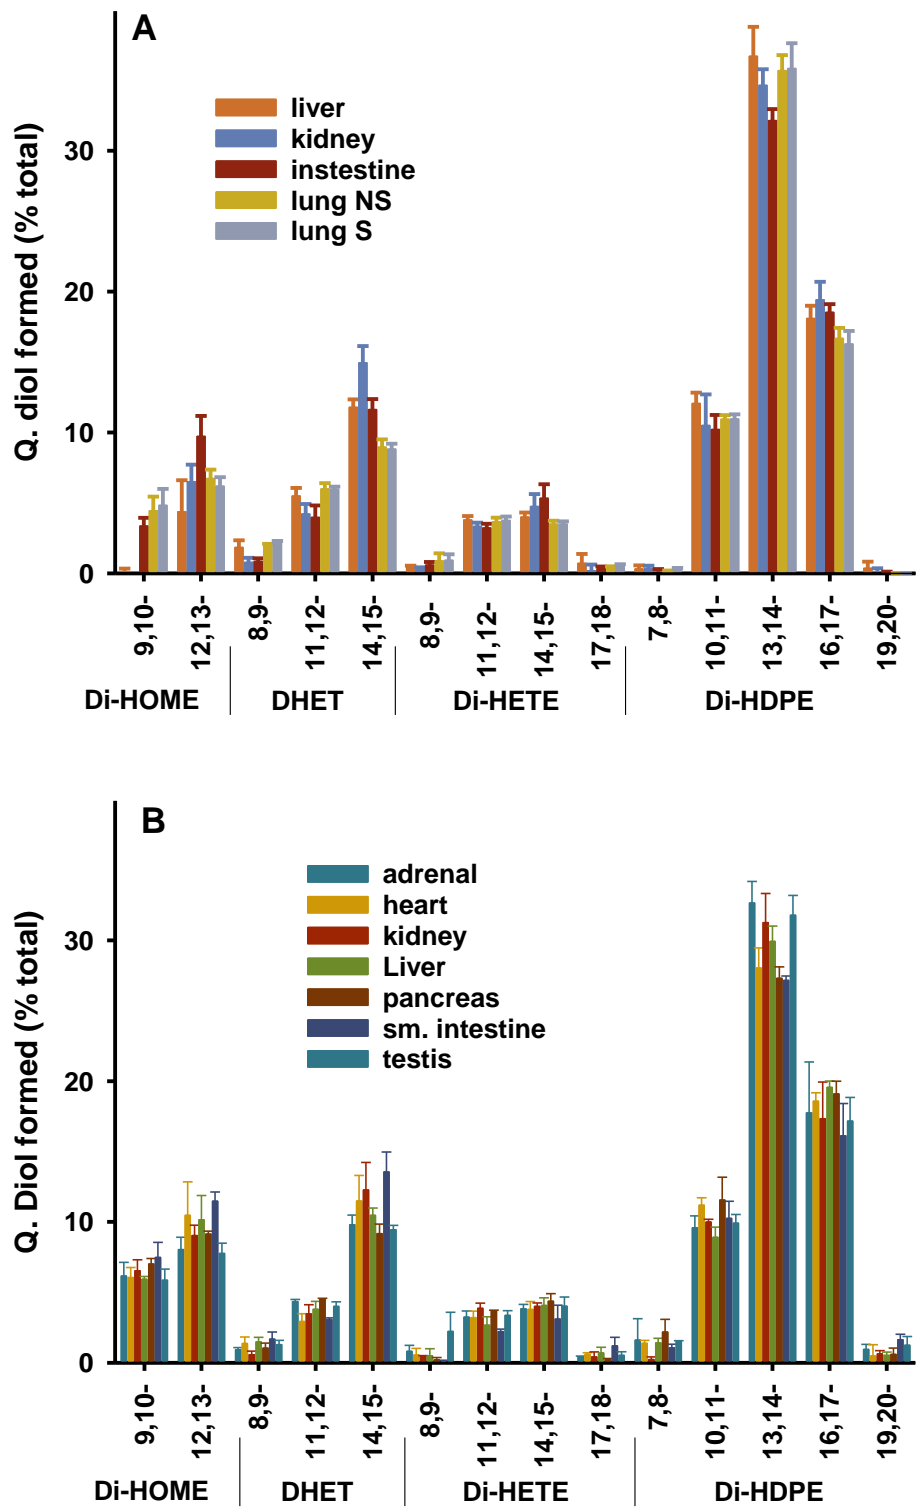

**Figure S3:** SDS-PAGE analysis of recombinant EHs. All proteins were produced in High Five cells (Invitrogen) that were grown at 27°C in ESF921 medium. The recombinant proteins were prepared as described in section 4.3 of the paper. The proteins were revealed using Coomassie blue. Identity of the targeted proteins was confirmed by Western-blot (not shown). Scanning densitometry suggests that the human sEH purity is >90%, the human mEH purity is 80%, the human EH3 purity is around 5%, and the human EH4 purity around 8%.

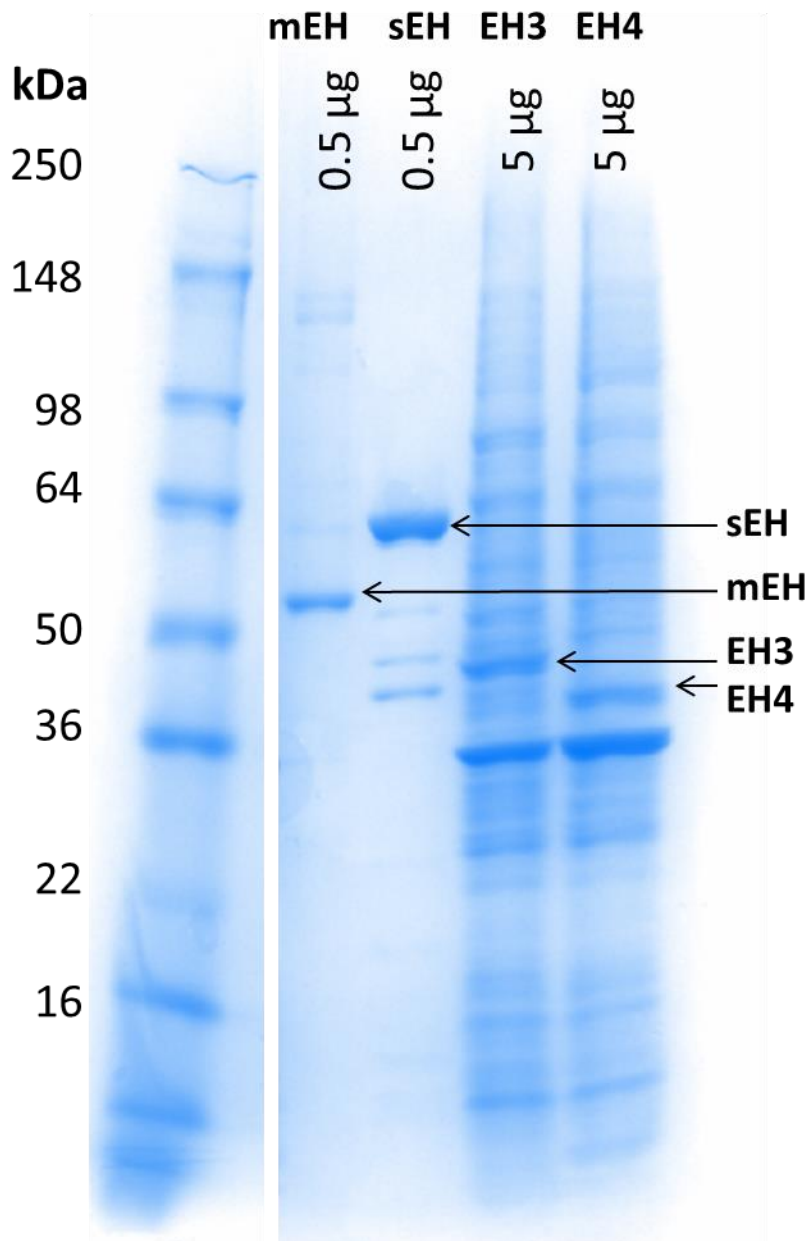

Supplement: s1 [file s1]
